# Supplementary material for: Scopolin ameliorates high-fat diet induced hepatic steatosis in mice: potential involvement of SIRT1-mediated signaling cascades in the liver
Source: PubMed Central journal article supplement (PMC5440403; doi:10.1038/s41598-017-02416-6), 2017-05-22
Supplement: 41598_2017_2416_MOESM1_ESM.pdf [file 41598_2017_2416_MOESM1_ESM.pdf]

## Supplementary Information

# Scopolin ameliorates high-fat diet induced hepatic steatosis in mice: potential involvement of SIRT1-mediated signaling cascades in the liver

Ahyoung Yoo<sup>1</sup>, Vikram P. Narayan<sup>1</sup>, Eun Young Hong<sup>2</sup>, Wan Kyunn Whang<sup>2</sup>, and Taesun Park<sup>1,\*</sup>

<sup>1</sup>Department of Food and Nutrition, Brain Korea 21 PLUS Project, Yonsei University, 50 Yonsei-ro, Seodaemun-gu, Seoul 03722, South Korea

<sup>2</sup>Pharmaceutical Botany Laboratory, College of Pharmacy, Chung-Ang University, Heukseok-dong, Dongjak-gu, Seoul 06974, South Korea

**\*Corresponding author:** Taesun Park, Department of Food and Nutrition, Yonsei University, 50 Yonsei-ro, Seodaemun-gu, Seoul 03722, South Korea

E-mail address: [tspark@yonsei.ac.kr](mailto:tspark@yonsei.ac.kr); Tel.: +82-2-2123-3123; Fax: +82-2-365-3118

**Supplementary Table 1.** Primer sequences used for semi-quantitative RT-PCR analysis

| Gene description                                                  | Primers | Sequences (5'→3')                            | Annealing temperature (°C) | PCR product (bp) |
|-------------------------------------------------------------------|---------|----------------------------------------------|----------------------------|------------------|
| Liver X receptor $\alpha$ (LXR $\alpha$ )                         | F<br>R  | TCCTACACGAGGATCAAGCG<br>AGTCGCAATGCAAAGACCTG | 55                         | 119              |
| Sterol regulatory element-binding factor 1c (SREBP1c)             | F<br>R  | ATCGCAAACAAGCTGACCTG<br>AGATCCAGGTTTGAGGTGGG | 55                         | 115              |
| Acetyl-CoA carboxylases (ACC)                                     | F<br>R  | GCCATTGGTATTGGGGCTTAC<br>CCCACCAAGGACTTTGTTG | 55                         | 119              |
| Lipoprotein lipase (LPL)                                          | F<br>R  | ACTTGTCATCTCATTCTGG<br>GCACCCAACCTCTCATAATT  | 55                         | 166              |
| Fatty acid synthase (FAS)                                         | F<br>R  | AGGTATGGCCACTTTGGGAC<br>GCTGGTCTTGCTGTGCATCT | 55                         | 103              |
| Adiponectin receptor 2 (AdipoR2)                                  | F<br>R  | ATGGTGGCGCTTTTCTCTGG<br>GCACAGGTCTTGCAAATGGC | 55                         | 136              |
| Sirtuin 1 (SIRT1)                                                 | F<br>R  | AGCTCCTTGGAGACTGCGAT<br>TGGGCGTGGAGGTTTTTCAG | 55                         | 122              |
| Peroxisome proliferator-activated receptor alpha (PPAR $\alpha$ ) | F<br>R  | TGGGGATGAAGAGGGCTGAG<br>ACGCAACGTAGAGTGCTGTG | 55                         | 197              |
| Carnitine palmitoyltransferase 1 (CPT1)                           | F<br>R  | GCCACCCAGAGGAGATTGAT<br>CCCAGGACTGGTTCATCCTT | 55                         | 110              |
| Monocyte chemoattractant protein-1 (MCP-1)                        | F<br>R  | GGGCAAGCTAGGCTGTGTTT<br>TAGCCACTCCTGGGAGCAAA | 55                         | 197              |
| Tumor necrosis factor-alpha (TNF $\alpha$ )                       | F<br>R  | CCCTCAGCAAACCACCAAGT<br>ACAAGGTACAACCCATCGGC | 55                         | 128              |
| Interleukin-6 (IL-6)                                              | F<br>R  | TCCAGTTGCCTTCTTGGGAC<br>ACAGGTCTGTTGGGAGTGGT | 55                         | 105              |
| Glyceraldehyde-3-phosphate dehydrogenase (GAPDH)                  | F<br>R  | CGTCTAGAAAAACCTGCCAA<br>ATGAGCTTGACAAAGTGGTC | 55                         | 191              |

**LXR $\alpha$**   
Product size: 119

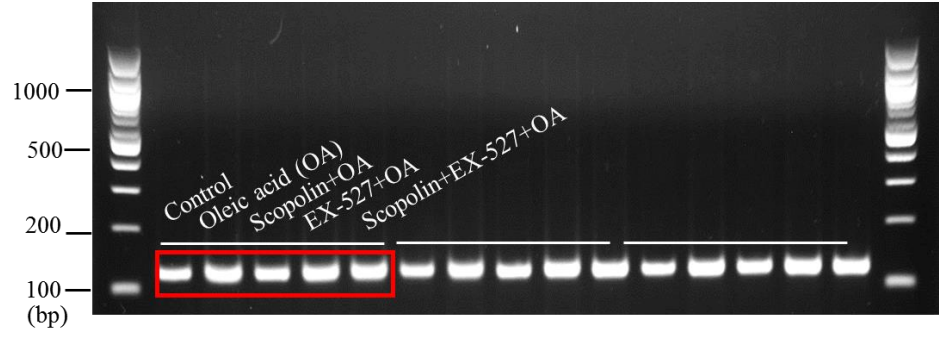

**SREBP1c**  
Product size : 115

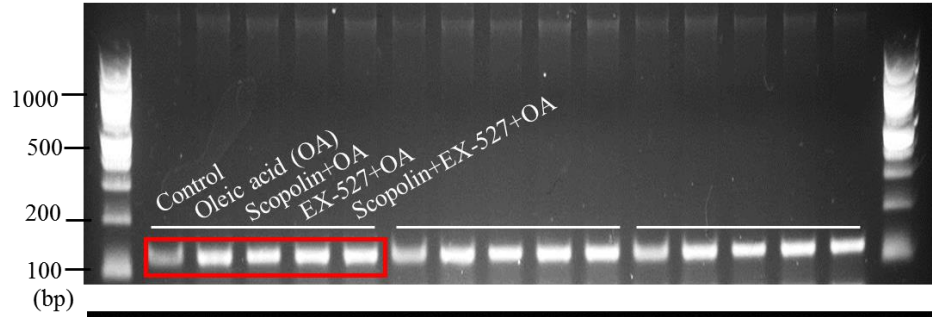

**ACC**  
Product size : 119

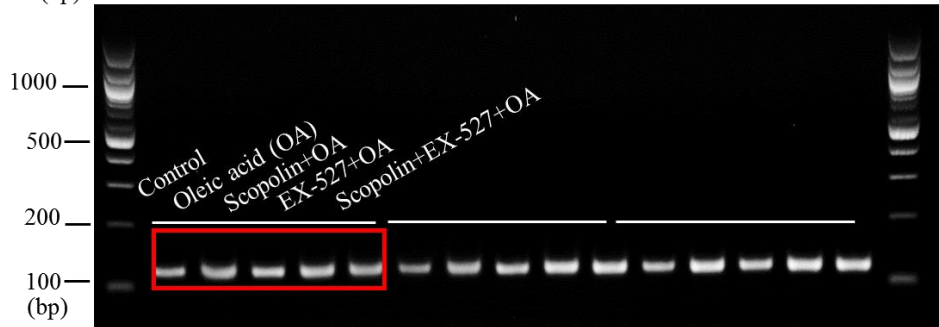

**LPL**  
Product size : 166

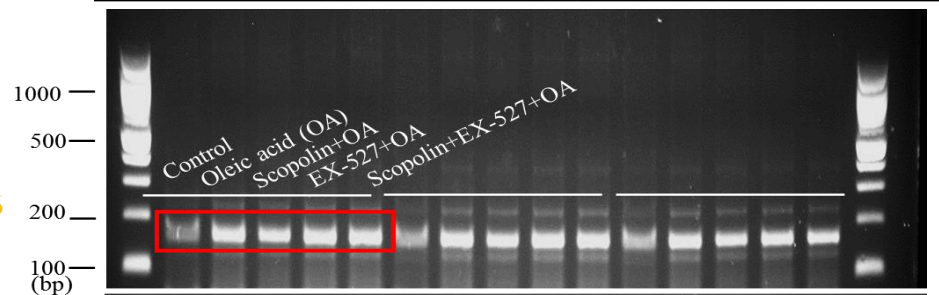

**FAS**  
Product size : 103

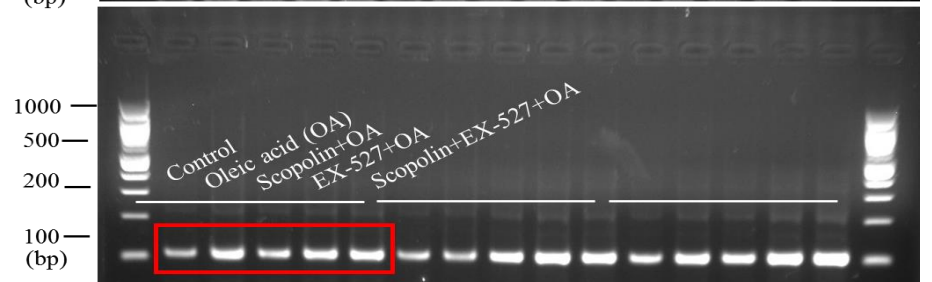

**GAPDH**  
Product size : 191

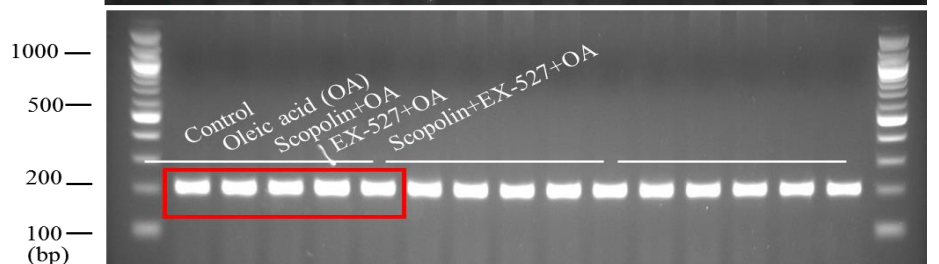

**Supplementary Figure S1.** Full length agarose gels relative to Fig 2C. Red boxes indicate the cropping lines used to generate the figures.

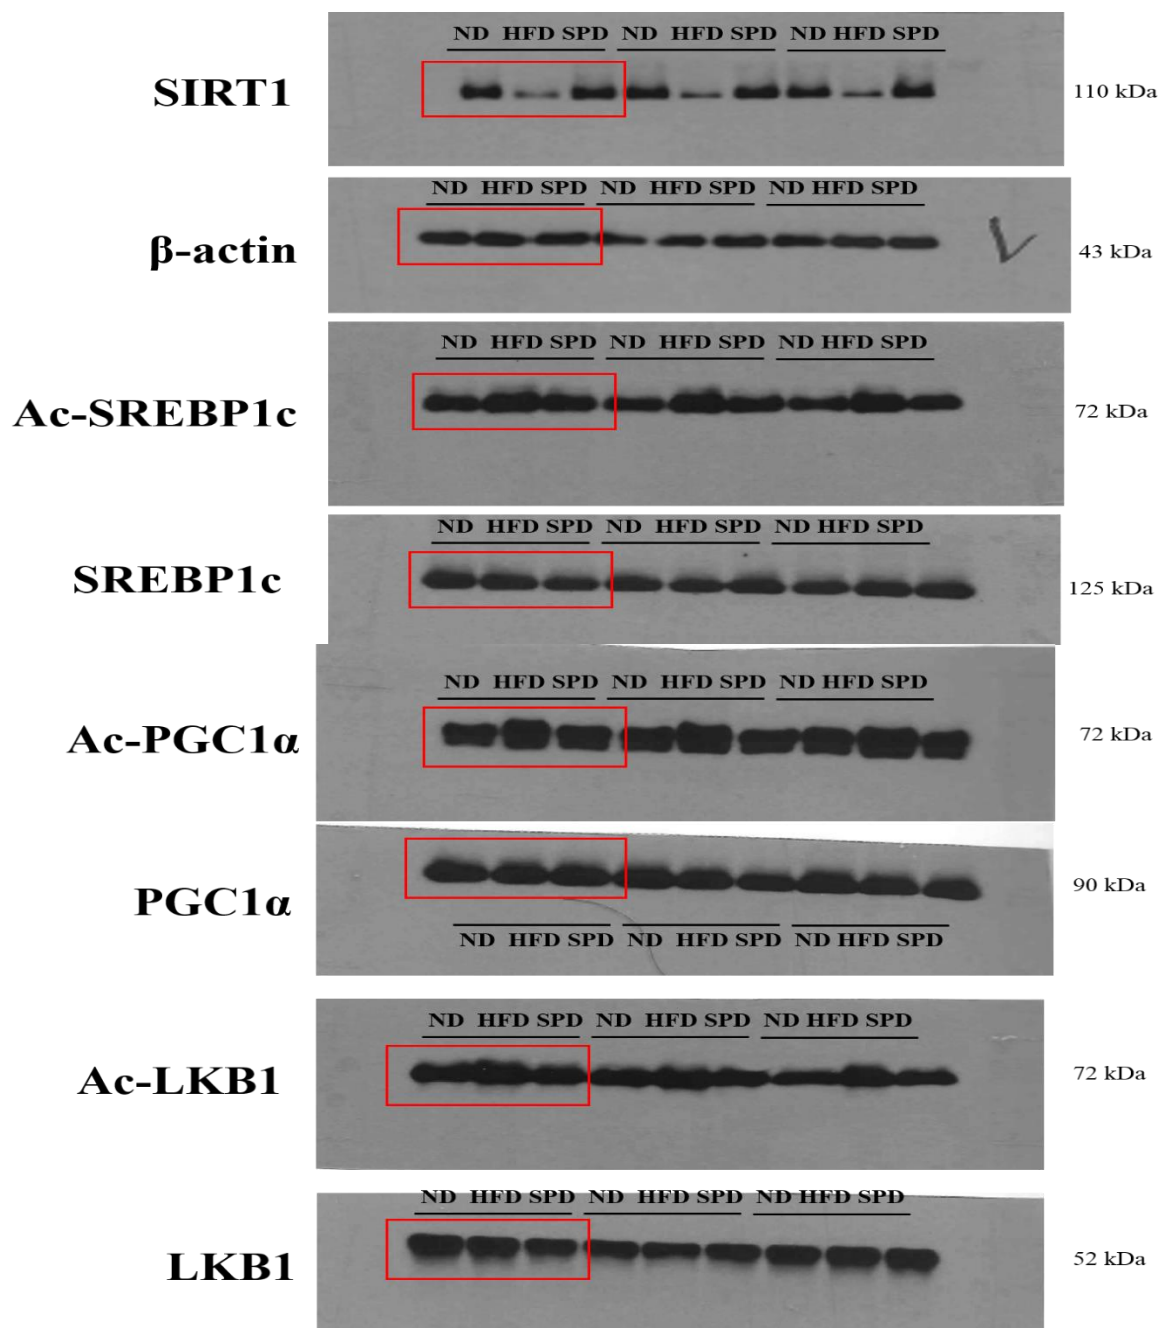

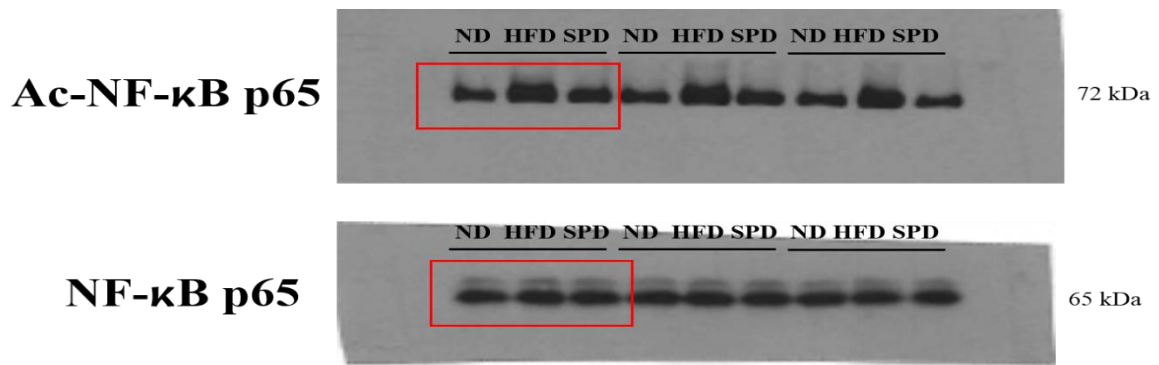

**Supplementary Figure S2.** Full length western blot membranes relative to Fig 5B. Red boxes indicate the cropping lines used to generate the figures.

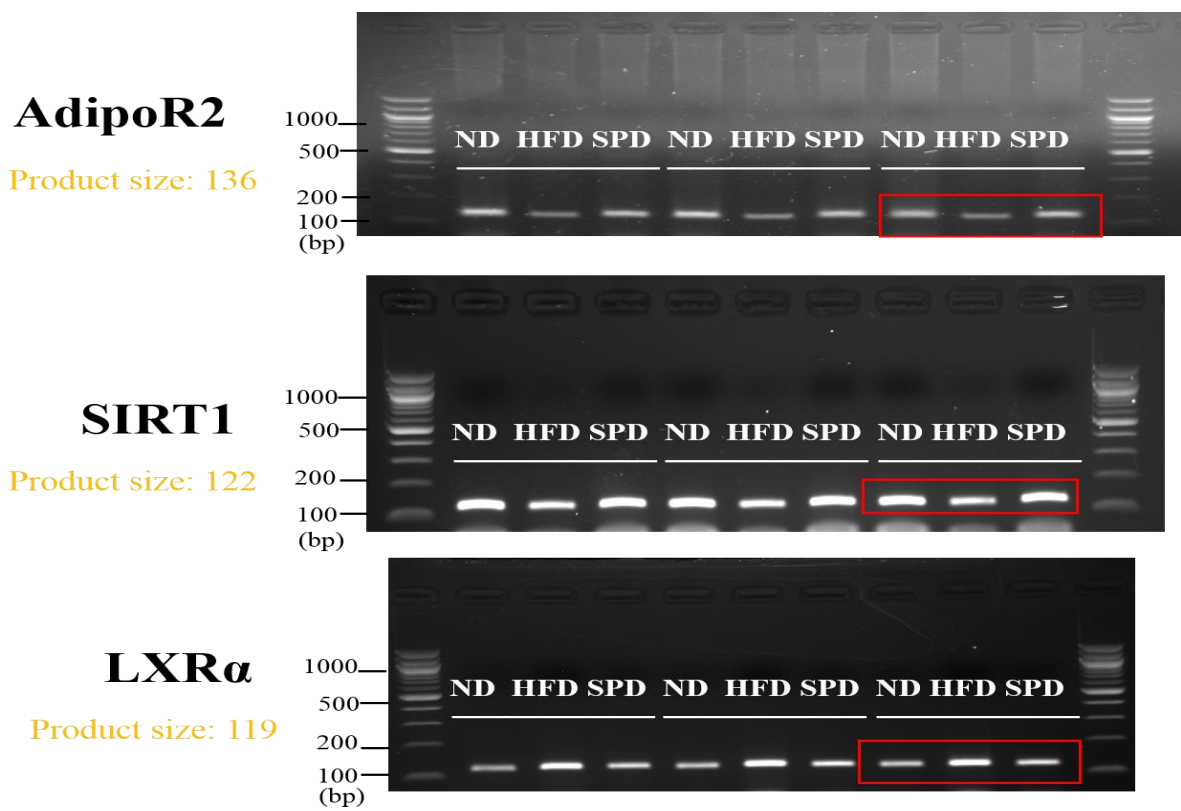

**ACC**  
Product size: 119

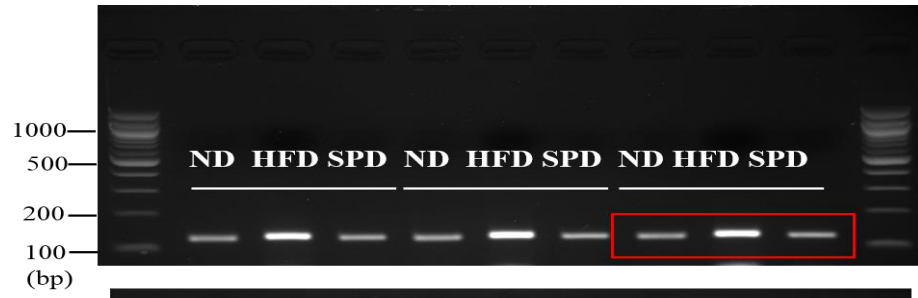

**LPL**  
Product size: 166

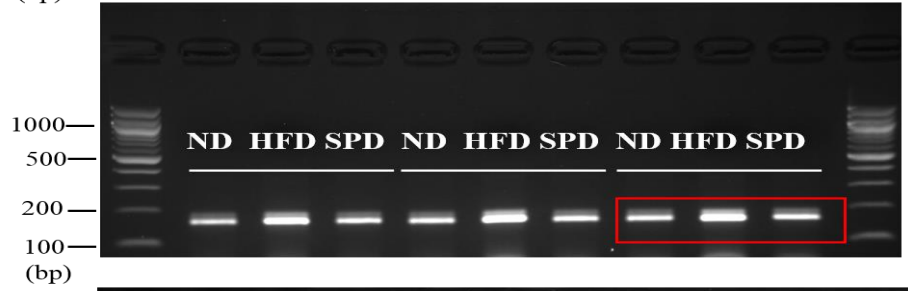

**FAS**  
Product size: 103

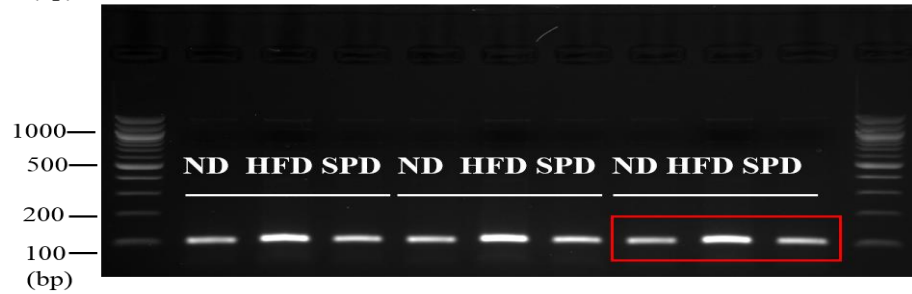

**PPAR $\alpha$**   
Product size: 197

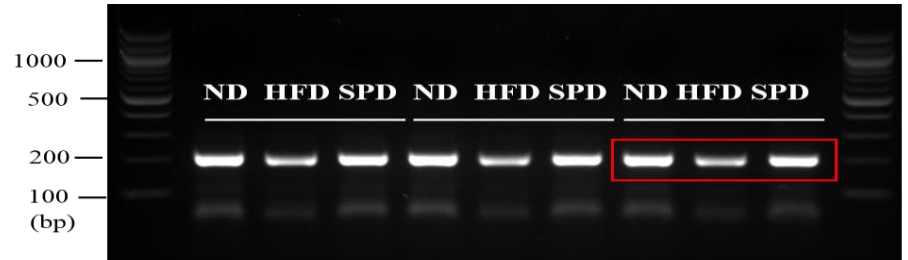

**CPT1**  
Product size: 110

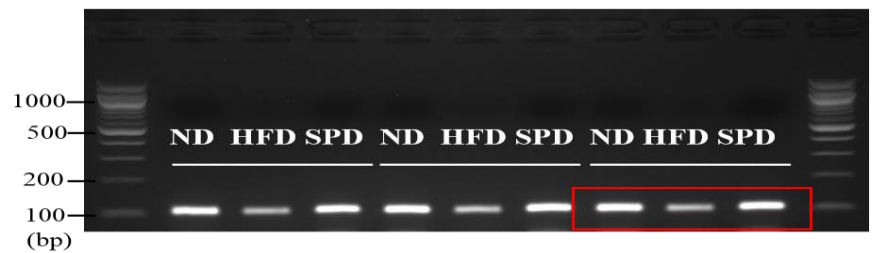

**MCP-1**  
Product size: 197

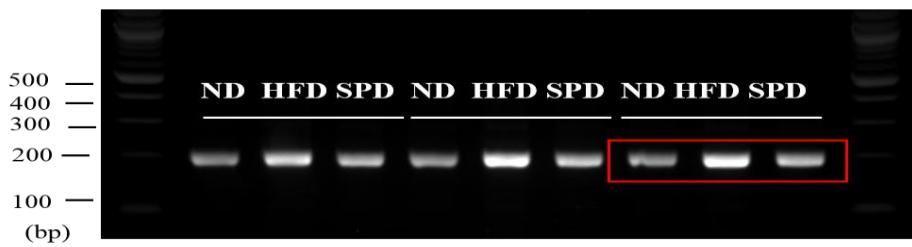

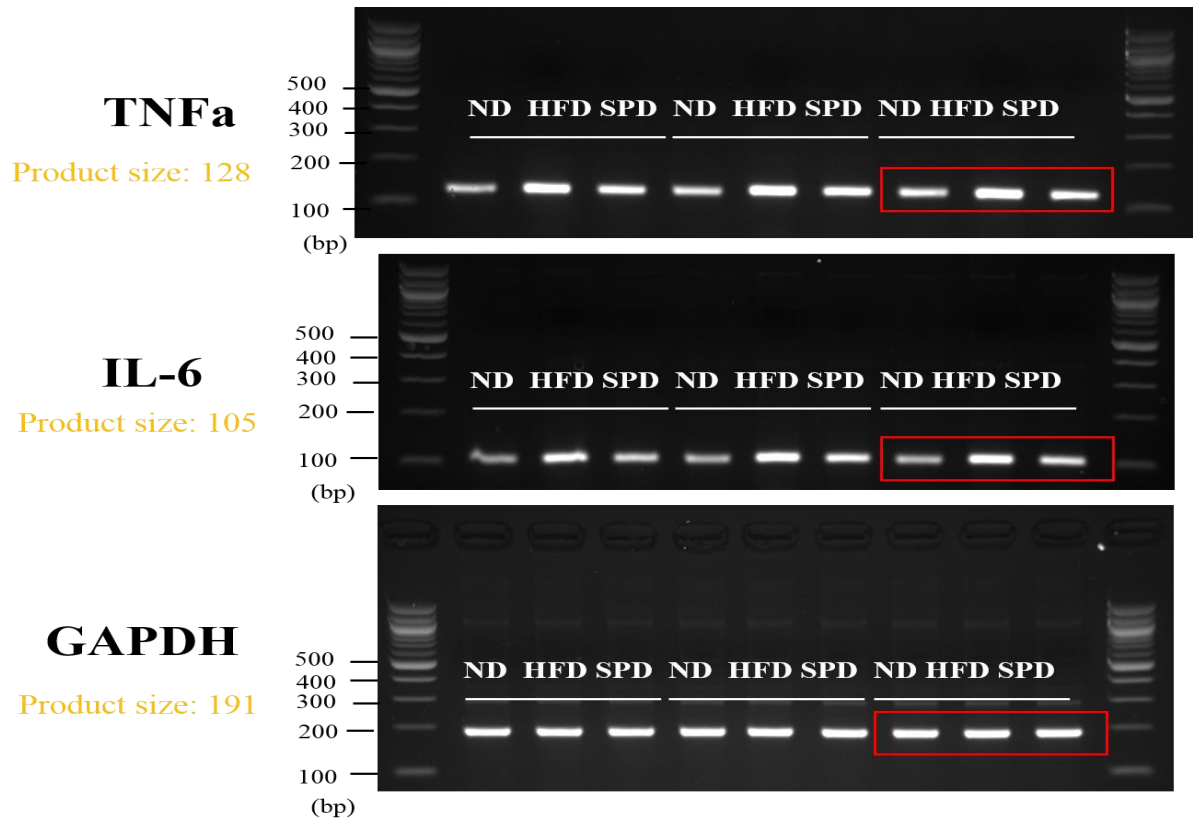

**Supplementary Figure S3.** Full length agarose gels relative to Fig 5C. Red boxes indicate the cropping lines used to generate the figures.

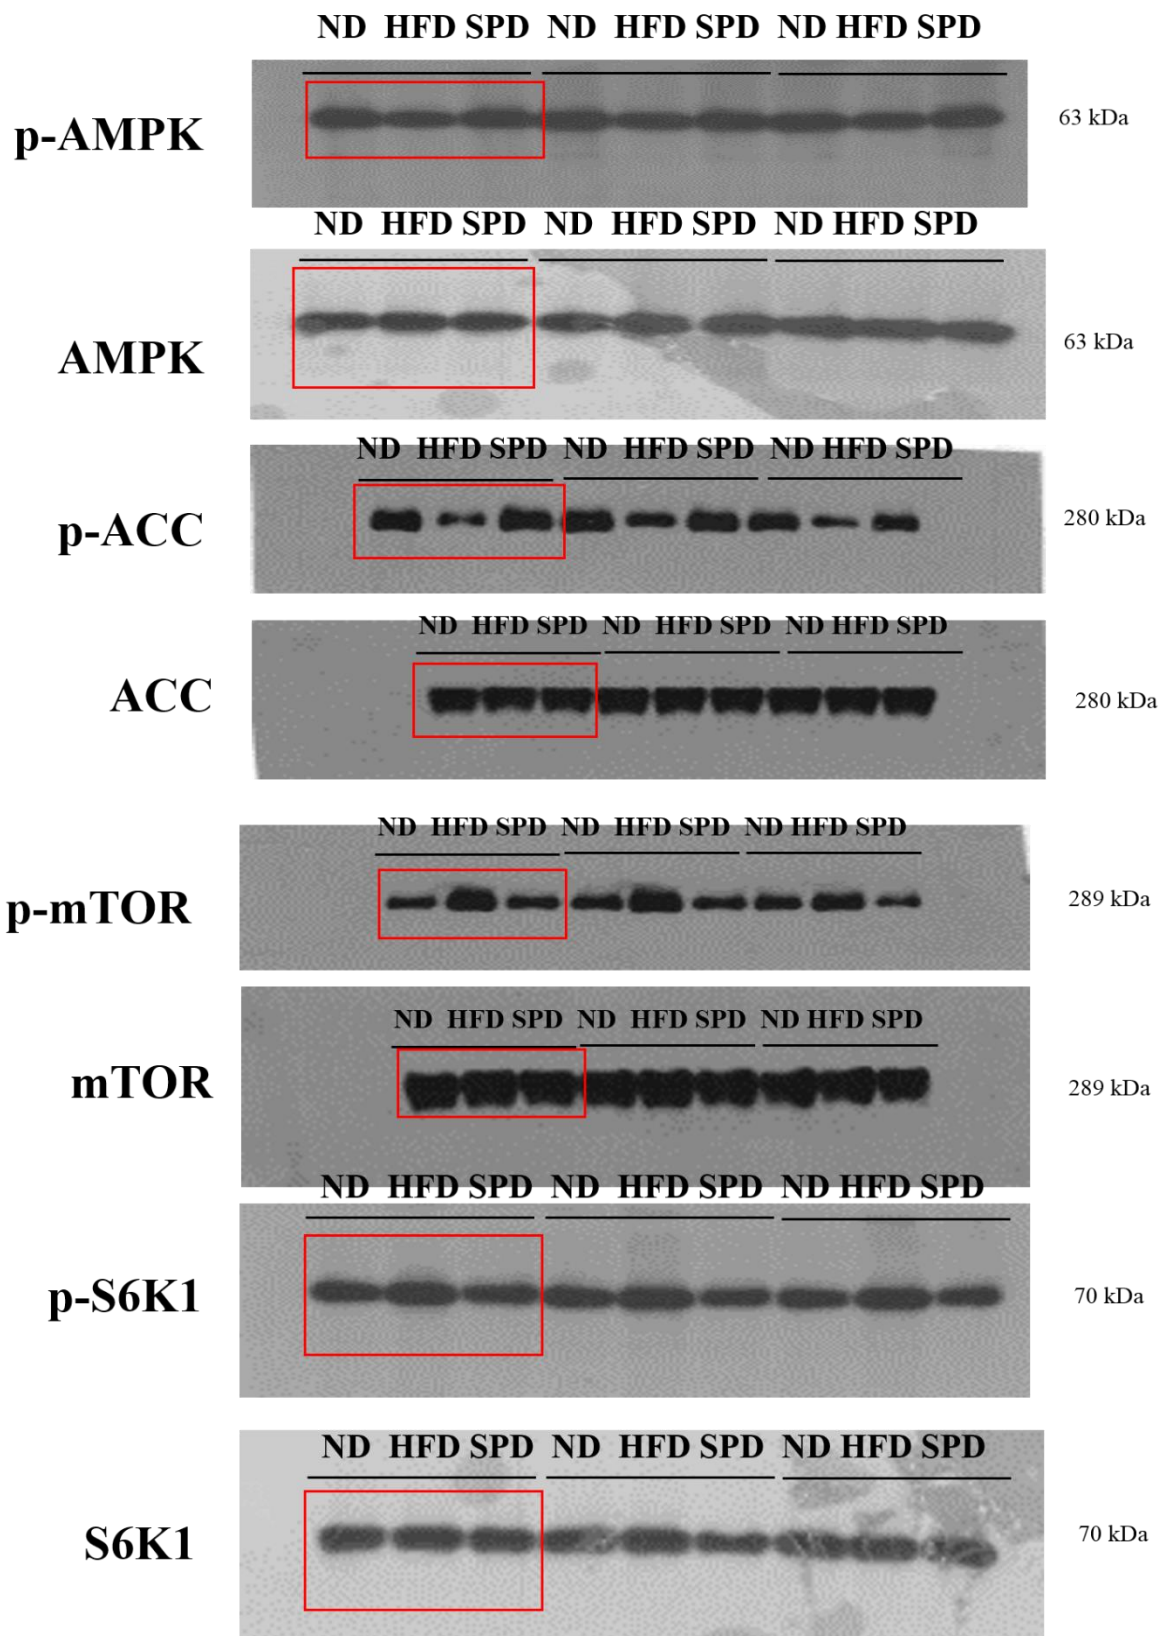

**Supplementary Figure 4S.** Full length western blot membranes relative to Fig 5D. Red boxes indicate the cropping lines used to generate the figures.
